# Supplementary material for: In Situ Construction of Elastic Solid-State Polymer Electrolyte with Fast Ionic Transport for Dendrite-Free Solid-State Lithium Metal Batteries
Source: MDPI journal article supplement (doi:10.3390/nano14050433), 2024-02-27
Supplement: s1 [file s1]

Supplementary Materials:

Figure S1: TG profiles of LZT/SN-SPE and SN-SPE; Figure S2: Electrochemical impedance curves of (a) LZT/SN-SPE and (b) SN-SPE at various temperature; Figure S3: Nyquist plots of the symmetric Li cells with (a) LZT/SN-SPE and (b) SN-SPE before and after polarization. Steady-state current measurement of the symmetric Li cells with (c) LZT/SN-SPE and (d) SN-SPE; Figure S4. XPS spectra of F 1s for the cycled lithium metal anode in Li|LZT/SN-SPE|Li; Figure S5. EIS evolution when cycling a Li|LZT/SN-SPE|Li cell at room temperature with a current density of  $1 \text{ mA cm}^{-2}$ ; Figure S6. Charge/discharge curves of LFP|LZT/SN-SPE|Li; Table S1 The electrochemical performance comparison of the LZT/SN-SPE with the other published works for ASSLBs.

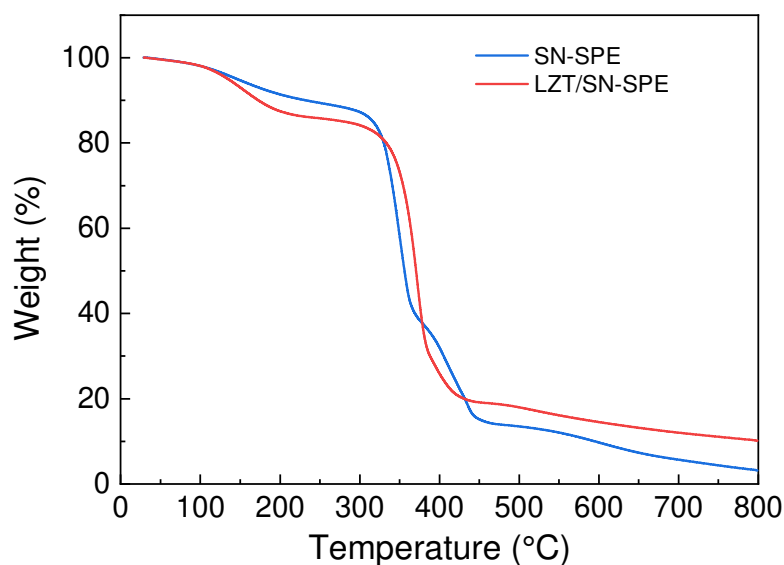

Figure S1. TG profiles of LZT/SN-SPE and SN-SPE

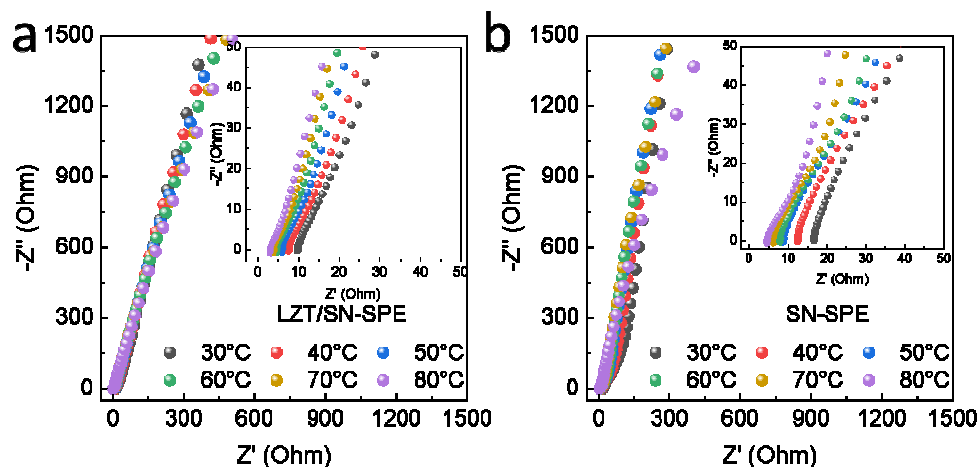

Figure S2. Electrochemical impedance curves of (a) LZT/SN-SPE and (b) SN-SPE at various temperature.

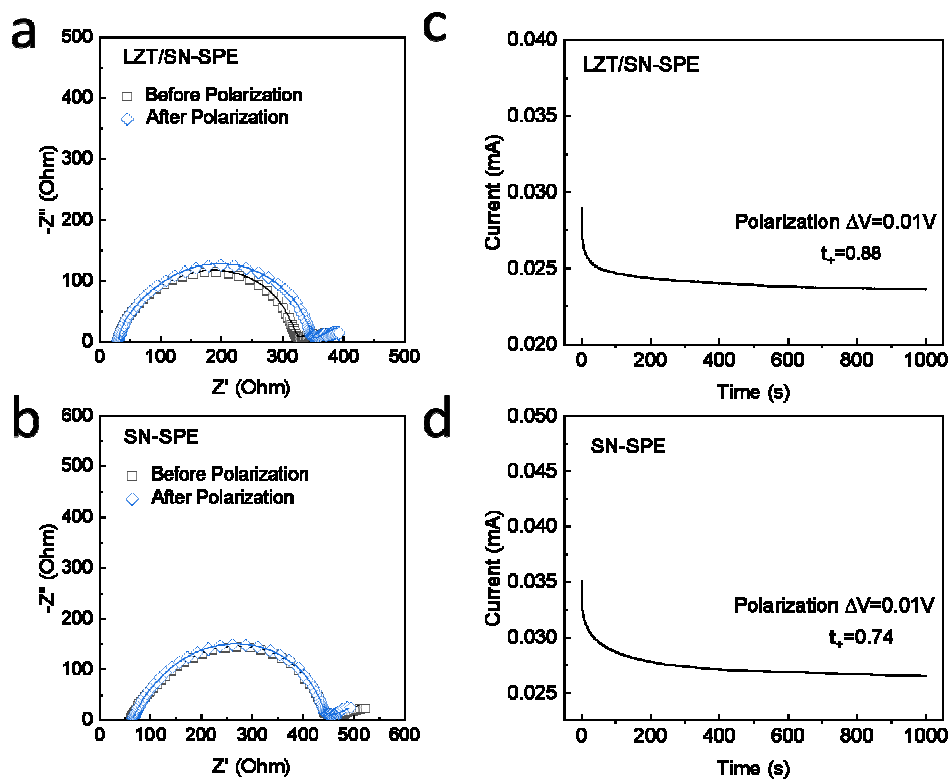

Figure S3. Nyquist plots of the symmetric Li cells with (a) LZT/SN-SPE and (b) SN-SPE before and after polarization. Steady-state current measurement of the symmetric Li cells with (c) LZT/SN-SPE and (d) SN-SPE.

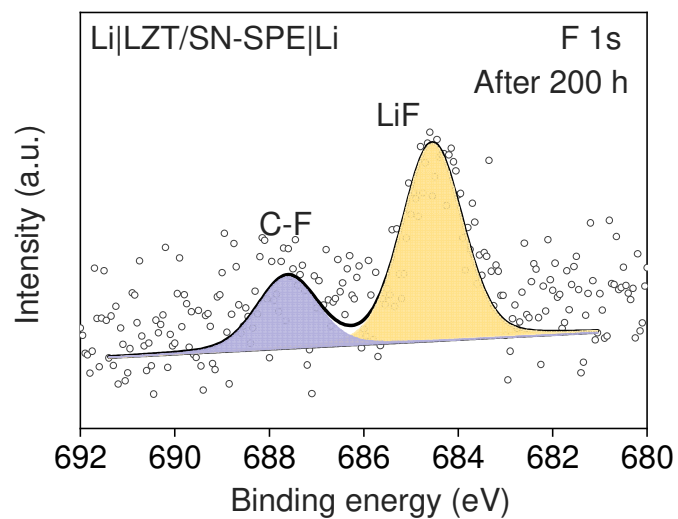

Figure S4. XPS spectra of F 1s for the cycled lithium metal anode in Li|LZT/SN-SPE|Li.

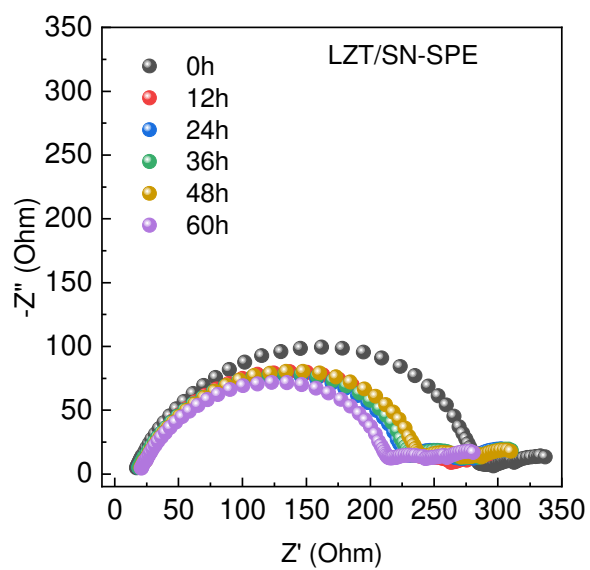

Figure S5. EIS evolution when cycling a Li|LZT/SN-SPE|Li cell at room temperature with a current density of  $1 \text{ mA cm}^{-2}$ .

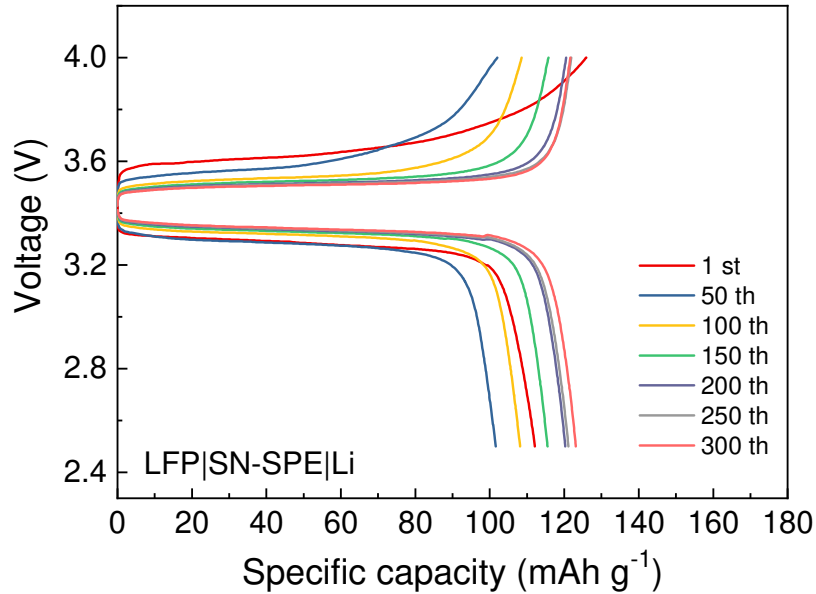

Figure S6. Charge/discharge curves of LFP|LZT/SN-SPE|Li.

Table S1 The electrochemical performance comparison of the LZT/SN-SPE with the other published works for ASSLBs.

| Ref.                | Sample                   | Anode Ca<br>thode | Cycle<br>performance         | capacity<br>decay<br>rate | Capacity<br>(mAh g <sup>-1</sup> ) | Rate(C) |
|---------------------|--------------------------|-------------------|------------------------------|---------------------------|------------------------------------|---------|
| <b>Our<br/>work</b> | LZT/SN-SPE               | Li LFP            | 420 cycles,<br>98.6% at 1C   | 0.003%                    | 136.63                             | 0.5     |
|                     |                          |                   |                              |                           | 136.56                             | 1       |
|                     |                          |                   |                              |                           | 126.69                             | 2       |
|                     |                          |                   |                              |                           | 118.36                             | 3       |
|                     |                          |                   |                              |                           | 106.03                             | 5       |
|                     |                          |                   |                              |                           | 92.40                              | 8       |
| [7]                 | LiTFSI/SN/PTF<br>E/LLZTO | Li LFP            | 200 cycles,<br>90.3% at 0.2C | 0.048%                    | 157                                | 0.1     |
|                     |                          |                   |                              |                           | 153                                | 0.2     |
|                     |                          |                   |                              |                           | 142                                | 0.3     |
|                     |                          |                   |                              |                           | 133                                | 0.5     |
|                     |                          |                   |                              |                           | 115                                | 1       |
| [14]                | LCPE-60                  | Li LFP            | 240 cycles,                  | 0.031%                    | 157                                | 0.1     |

|               |                                 |        |                               |        |       |     |
|---------------|---------------------------------|--------|-------------------------------|--------|-------|-----|
| 92.6% at 0.5C |                                 |        |                               |        | 153   | 0.2 |
|               |                                 |        |                               |        | 146   | 1   |
|               |                                 |        |                               |        | 140   | 2   |
|               |                                 |        |                               |        | 131   | 3   |
|               |                                 |        |                               |        | 86    | 5   |
| [16]          | IPLL-SSE                        | Li LFP | 200 cycles,<br>84% at 1C      | 0.08%  | 169.5 | 0.2 |
|               |                                 |        |                               |        | 160.5 | 0.3 |
|               |                                 |        |                               |        | 141.1 | 0.5 |
|               |                                 |        |                               |        | 125.8 | 1   |
|               |                                 |        |                               |        | 106.3 | 2   |
| [23]          | PVDF-HFP/S<br>N/LiTFSI          | Li LFP | 300 cycles, 98%<br>at 0.5C    | 0.007% | 162   | 0.1 |
|               |                                 |        |                               |        | 164   | 0.2 |
|               |                                 |        |                               |        | 160   | 0.5 |
|               |                                 |        |                               |        | 157   | 1   |
|               |                                 |        |                               |        | 148   | 2   |
| [24]          | LLZTO@SN/<br>PAN                | Li LFP | 500 cycles,<br>87% at 0.2C    | 0.026% | 163   | 0.1 |
|               |                                 |        |                               |        | 160   | 0.2 |
|               |                                 |        |                               |        | 150   | 0.5 |
|               |                                 |        |                               |        | 126   | 1   |
|               |                                 |        |                               |        | 72    | 2   |
| [41]          | TPU/LLZTO/<br>SN                | Li LFP | 100 cycles, 88%<br>at 0.5C    | 0.12%  | 168   | 0.1 |
|               |                                 |        |                               |        | 163   | 0.2 |
|               |                                 |        |                               |        | 150   | 0.5 |
|               |                                 |        |                               |        | 135   | 1   |
|               |                                 |        |                               |        | 121   | 2   |
| [48]          | SN-CPE                          | Li LFP | 350 cycles,<br>88.3% at 1C    | 0.033% | 66    | 5   |
|               |                                 |        |                               |        | 160   | 0.1 |
|               |                                 |        |                               |        | 156   | 0.2 |
|               |                                 |        |                               |        | 155   | 0.5 |
|               |                                 |        |                               |        | 149   | 1   |
| [52]          | PVDF-HFP-1<br>5%LLZO-LI<br>TFSI | Li LFP | 180 cycles,<br>92.5% at 0.5 C | 0.042% | 133   | 2   |
|               |                                 |        |                               |        | 140   | 0.1 |
|               |                                 |        |                               |        | 124   | 0.2 |
|               |                                 |        |                               |        | 113   | 0.5 |
|               |                                 |        |                               |        | 100   | 1   |
|               |                                 |        |                               |        | 82    | 2   |
